# Supplementary material for: Structural and Comparative Analysis of the Complete Chloroplast Genome of Pyrus hopeiensis—“Wild Plants with a Tiny Population”—and Three Other Pyrus Species
Source: PubMed Central journal article supplement (PMC6214102; doi:10.3390/ijms19103262), 2018-10-20
Supplement: ijms-19-03262-s001.pdf [file ijms-19-03262-s001.pdf]

## Supplementary Tables

**Table 1.** The Ka, Ks, and Ka/Ks values of *Pyrus ussuriensis* Maxim. cv. Jingbaili with respect to *Pyrus hopeiensis* HB-1.

| Gene  | Ka          | Ks          | Ka/Ks    |
|-------|-------------|-------------|----------|
| atpE  | 0.00330523  | 6.61E-05    | 50       |
| atpI  | 0.00173843  | 3.48E-05    | 50       |
| cemA  | 0.00173319  | 3.47E-05    | 50       |
| ndhD  | 0.000813839 | 0.00322951  | 0.252001 |
| ndhF  | 0.000507657 | 1.15E-05    | 44.1353  |
| ndhH  | 4.03E-06    | 0.00403312  | 0.001    |
| psaA  | 2.46E-06    | 0.00245945  | 0.001    |
| psbC  | 0.000965312 | 0.00375455  | 0.257104 |
| rpl20 | 1.33E-05    | 0.0133305   | 0.001    |
| rpl22 | 2.01E-05    | 0.0200741   | 0.001    |
| rpoC2 | 1.28E-06    | 0.00128285  | 0.001    |
| rps11 | 1.36E-05    | 0.0135706   | 0.001    |
| rps18 | 0.00965489  | 0.000193098 | 50       |
| ycf2  | 0.000189159 | 4.43E-06    | 42.6809  |
| ycf4  | 7.72E-06    | 0.00771876  | 0.001    |

**Table 2.** The Ka, Ks, and Ka/Ks values of *Pyrus hopeiensis* HB-2 with respect to *Pyrus hopeiensis* HB-1.

| Gene  | Ka       | Ks         | Ka/Ks    |
|-------|----------|------------|----------|
| psaJ  | 0.975189 | 1.06165    | 0.918564 |
| rpl20 | 0.139324 | 0.46208    | 0.301515 |
| rps18 | 0.151566 | 0.232439   | 0.652066 |
| ycf1  | 1.14E-06 | 0.00114463 | 0.001    |

**Table 3.** The Ka, Ks, and Ka/Ks values of *Pyrus betulifolia* with respect to *Pyrus hopeiensis* HB-1.

| Gene  | Ka          | Ks         | Ka/Ks    |
|-------|-------------|------------|----------|
| atpB  | 0.000850914 | 0.00320718 | 0.265315 |
| atpE  | 0.00330523  | 6.61E-05   | 50       |
| ndhD  | 6.02E-06    | 0.00602035 | 0.001    |
| ndhF  | 0.000507657 | 1.15E-05   | 44.1353  |
| ndhH  | 4.03E-06    | 0.00403312 | 0.001    |
| ndhI  | 0.00246242  | 5.55E-05   | 44.3741  |
| ndhK  | 9.65E-06    | 0.00964948 | 0.001    |
| psbC  | 0.000826306 | 1.98E-05   | 41.832   |
| rpl20 | 1.33E-05    | 0.0133305  | 0.001    |
| rpl22 | 2.01E-05    | 0.0200741  | 0.001    |
| rpoB  | 0.000415185 | 1.64E-05   | 25.3714  |
| rpoC2 | 1.28E-06    | 0.00128285 | 0.001    |
| rps11 | 1.36E-05    | 0.0135706  | 0.001    |
| rps18 | 0.00453543  | 9.07E-05   | 50       |
| ycf1  | 0.000209746 | 0.00348348 | 0.060212 |
| ycf2  | 0.000189159 | 4.43E-06   | 42.6809  |

**Table 4.** The Ka, Ks, and Ka/Ks values of *Pyrus communis* L.cv.Early Red Comice with respect to *Pyrus hopeiensis* HB-1.

| Gene  | Ka          | Ks          | Ka/Ks     |
|-------|-------------|-------------|-----------|
| accD  | 0.00168934  | 0.00408468  | 0.413579  |
| atpA  | 2.78E-06    | 0.00278319  | 0.001     |
| atpE  | 1.04E-05    | 0.0104078   | 0.001     |
| cemA  | 1.82E-05    | 0.0182325   | 0.001     |
| ndhA  | 3.83E-06    | 0.00383102  | 0.001     |
| ndhD  | 2.85E-06    | 0.0028529   | 0.001     |
| ndhF  | 0.00268051  | 0.00282506  | 0.948835  |
| petA  | 6.03E-06    | 0.00603266  | 0.001     |
| psaA  | 0.000574263 | 0.00550034  | 0.104405  |
| psaB  | 1.97E-06    | 0.00196951  | 0.001     |
| psbC  | 0.000826306 | 1.98E-05    | 41.832    |
| psbK  | 0.00632895  | 0.000126579 | 50        |
| rbcL  | 0.00170222  | 0.0134876   | 0.126207  |
| rpl22 | 0.00275821  | 0.0120906   | 0.228129  |
| rpoA  | 0.00276728  | 5.76E-05    | 48.0785   |
| rpoB  | 0.000384755 | 0.00230756  | 0.166737  |
| rpoC2 | 0.000298614 | 0.00495215  | 0.0602999 |
| rps11 | 1.36E-05    | 0.0135706   | 0.001     |
| rps14 | 0.00413262  | 8.27E-05    | 50        |
| rps18 | 0.00453543  | 9.07E-05    | 50        |
| rps2  | 1.13E-05    | 0.0112847   | 0.001     |
| rps3  | 0.00181912  | 0.00874131  | 0.208106  |
| ycf2  | 0.000189159 | 4.43E-06    | 42.6809   |
| ycf4  | 0.00255932  | 0.0077202   | 0.331509  |
